# Supplementary material
Source: publisher figshare collection journal article supplement (https://acs.figshare.com/ndownloader/files/4423432)
Supplement: Supplementary file 1 [file 4423432]

data_global
#data_New_Global_Publ_Block

_publ_requested_journal           'J.Org.Chem.'
_publ_contact_author_name         'Dmitry Yufit'
_publ_contact_author_address
;
Department of Chemistry
Durham University
South Rd.
Durham
DH1 3LE
UK
;
_publ_contact_author_email        'd.s.yufit@durham.ac.uk'


_publ_contact_author_phone    '0191 334 2004'
_publ_contact_author_fax      '0191 384 4737'

_publ_contact_letter
;
The CIF file contains data for the structure 14b from
the paper 

"Stereoselective cycloaddition of dibenzoxazepinium ylides to
acetylenes and fullerene C~60~. Conformational behaviour of
3-aryldibenzo[b,f]pyrrolo[1,2-d][1,4]oxazepine systems"

by  A.F.Khlebnikov, M.S.Novikov, P.P.Petrovskii, A.S.Konev, 
D.S.Yufit, S.I.Selivanov and H.Frauendorf. 

The paper will be submitted to J.Org.Chem. 
;

loop_
_publ_author_name
_publ_author_address
'Khlebnikov, Alexander F.'
;
Department of Chemistry
Saint Petersburg State University
Universitetskii pr. 26
198504
St.Petersburg
Russia
;
'Novikov, Mikhail S.'
;
Department of Chemistry
Saint Petersburg State University
Universitetskii pr. 26
198504
St.Petersburg
Russia
;
'Petrovskii, Petr P.'
;
Department of Chemistry
Saint Petersburg State University
Universitetskii pr. 26
198504
St.Petersburg
Russia
;
'Konev, Alexander S.'
;
Department of Chemistry
Saint Petersburg State University
Universitetskii pr. 26
198504
St.Petersburg
Russia
;
'Yufit, Dmitry S.'
;
Department of Chemistry
Durham University
South Rd.
Durham
DH1 3LE
UK
;
'Selivanov, Stanislav I.'
;
Department of Chemistry
Saint Petersburg State University
Universitetskii pr. 26
198504
St.Petersburg
Russia
;
'Frauendorf, Holm'
;
Institut f\"ur Organische und Biomolekulare Chemie
der Georg-August-Universit\"at G\"ottingen,
Tammannstrasse 2
G\"ottingen
D-37077
Germany
;

data_SAD_14B
_audit_creation_method            SHELXL-97
_chemical_formula_moiety          'C25 H21 N O3'
_chemical_formula_sum             'C25 H21 N O3'
_chemical_formula_weight          383.43
_chemical_melting_point           153
_chemical_name_common             ?
_chemical_name_systematic         
;
Methyl (3RS,13bRS)-2-methyl-3-phenyl-3,13b-dihydrodibenzo[b,f]
pyrrolo[1,2-d][1,4]oxazepine-1-carboxylate
;
loop_
  _atom_type_symbol
  _atom_type_description
  _atom_type_scat_dispersion_real
  _atom_type_scat_dispersion_imag
  _atom_type_scat_source
 'C' 'C' 0.0033 0.0016 'International Tables Vol C Tables 4.2.6.8 and 6.1.1.4'
 'H' 'H' 0.0000 0.0000 'International Tables Vol C Tables 4.2.6.8 and 6.1.1.4'
 'N' 'N' 0.0061 0.0033 'International Tables Vol C Tables 4.2.6.8 and 6.1.1.4'
 'O' 'O' 0.0106 0.0060 'International Tables Vol C Tables 4.2.6.8 and 6.1.1.4'

_symmetry_cell_setting            'Monoclinic'
_symmetry_space_group_name_H-M    'P 1 21/c 1'
_symmetry_space_group_name_Hall   '-P 2ybc'
loop_
  _symmetry_equiv_pos_as_xyz
 'x, y, z'
 '-x, y+1/2, -z+1/2'
 '-x, -y, -z'
 'x, -y-1/2, z-1/2'

_cell_angle_alpha                 90.00
_cell_angle_beta                  97.23(2)
_cell_angle_gamma                 90.00
_cell_formula_units_Z             4
_cell_length_a                    11.8716(5)
_cell_length_b                    15.0615(6)
_cell_length_c                    10.6577(4)
_cell_measurement_reflns_used     1713
_cell_measurement_temperature     120.0
_cell_measurement_theta_max       30.203
_cell_measurement_theta_min       2.351
_cell_volume                      1890.49(14)
_exptl_absorpt_coefficient_mu     0.088
_exptl_absorpt_correction_T_max   1.0
_exptl_absorpt_correction_T_min   0.037
_exptl_absorpt_correction_type    multi-scan
_exptl_absorpt_process_details    
;
 SADABS-2006/1 (Bruker,2006) was used for absorption correction.
 R(int) was 0.0564 before and 0.0418 after correction.
 The Ratio of minimum to maximum transmission is 0.037.
 The \l/2 correction factor is 0.0015
;
_exptl_crystal_F_000              808
_exptl_crystal_colour             less
_exptl_crystal_colour_lustre      clear
_exptl_crystal_colour_modifier    light
_exptl_crystal_colour_primary     colourless
_exptl_crystal_density_diffrn     1.347
_exptl_crystal_density_meas       ?
_exptl_crystal_density_method     'not measured'
_exptl_crystal_description        plate
_exptl_crystal_size_max           0.2
_exptl_crystal_size_mid           0.2
_exptl_crystal_size_min           0.02
_exptl_special_details            '?'
_diffrn_ambient_temperature       120.15
_diffrn_detector                  'CCD area detector'
_diffrn_detector_area_resol_mean  8.0
_diffrn_detector_type             'Bruker SMART CCD 6000 area detector'
_diffrn_measured_fraction_theta_full 0.998
_diffrn_measured_fraction_theta_max 0.998
_diffrn_measurement_device        'three-circle diffractometer'
_diffrn_measurement_device_type   'CCD area detector'
_diffrn_measurement_method        '/w-scan'
_diffrn_radiation_monochromator   graphite
_diffrn_radiation_probe           x-ray
_diffrn_radiation_source          'fine-focus sealed tube'
_diffrn_radiation_type            'MO K\a'
_diffrn_radiation_wavelength      0.71073
_diffrn_radiation_xray_symbol     K-L~3~
_diffrn_reflns_av_R_equivalents   0.1200
_diffrn_reflns_av_sigmaI/netI     0.1343
_diffrn_reflns_limit_h_max        15
_diffrn_reflns_limit_h_min        -15
_diffrn_reflns_limit_k_max        19
_diffrn_reflns_limit_k_min        -19
_diffrn_reflns_limit_l_max        12
_diffrn_reflns_limit_l_min        -13
_diffrn_reflns_number             15089
_diffrn_reflns_theta_full         27.50
_diffrn_reflns_theta_max          27.50
_diffrn_reflns_theta_min          1.73
_diffrn_source                    'sealed X-ray tube'
_diffrn_source_current            40.0
_diffrn_source_power              2.0
_diffrn_source_target             Mo
_diffrn_source_voltage            50.0
_diffrn_standards_decay_%         ?
_diffrn_standards_interval_count  ?
_diffrn_standards_interval_time   ?
_diffrn_standards_number          ?
_reflns_number_gt                 2035
_reflns_number_total              4331
_reflns_threshold_expression      >2sigma(I)
_computing_cell_refinement        'SAINT v6.45A (Bruker, 2003)'
_computing_data_collection        'Bruker SMART'
_computing_data_reduction         'SAINT v6.45A (Bruker, 2003)'
_computing_molecular_graphics     
;
 OLEX2: a complete structure solution, refinement and analysis program.
 Dolomanov et al., J. Appl. Cryst. (2009). 42, 339-341
;
_computing_publication_material   
;
 OLEX2: a complete structure solution, refinement and analysis program.
 Dolomanov et al., J. Appl. Cryst. (2009). 42, 339-341
;
_computing_structure_refinement   'SHELXL-97 (Sheldrick, 1997)'
_computing_structure_solution     'SHELXS-97 (Sheldrick, 1990)/Bruker'
_refine_diff_density_max          0.239
_refine_diff_density_min          -0.244
_refine_diff_density_rms          0.059
_refine_ls_R_factor_all           0.1542
_refine_ls_R_factor_gt            0.0568
_refine_ls_extinction_coef        ?
_refine_ls_extinction_method      none
_refine_ls_goodness_of_fit_ref    0.994
_refine_ls_hydrogen_treatment     refall
_refine_ls_matrix_type            full
_refine_ls_number_parameters      346
_refine_ls_number_reflns          4331
_refine_ls_number_restraints      0
_refine_ls_restrained_S_all       0.994
_refine_ls_shift/su_max           0.001
_refine_ls_shift/su_mean          0.000
_refine_ls_structure_factor_coef  Fsqd
_refine_ls_wR_factor_gt           0.1069
_refine_ls_wR_factor_ref          0.1310
_refine_ls_weighting_details      
;
calc w=1/[\s^2^(Fo^2^)+(0.0200P)^2^+0.0000P] where P=(Fo^2^+2Fc^2^)/3
;
_refine_ls_weighting_scheme       calc
_refine_special_details           
;
 Refinement of F^2^ against ALL reflections. The weighted R-factor wR and
 goodness of fit S are based on F^2^, conventional R-factors R are based
 on F, with F set to zero for negative F^2^. The threshold expression of
 F^2^ > 2sigma(F^2^) is used only for calculating R-factors(gt) etc. and is
 not relevant to the choice of reflections for refinement. R-factors based
 on F^2^ are statistically about twice as large as those based on F, and R-
 factors based on ALL data will be even larger.
;
_atom_sites_solution_hydrogens    difmap
_atom_sites_solution_primary      direct
_atom_sites_solution_secondary    difmap
loop_
  _atom_site_label
  _atom_site_type_symbol
  _atom_site_fract_x
  _atom_site_fract_y
  _atom_site_fract_z
  _atom_site_U_iso_or_equiv
  _atom_site_adp_type
  _atom_site_occupancy
  _atom_site_symmetry_multiplicity
  _atom_site_calc_flag
  _atom_site_refinement_flags
  _atom_site_disorder_assembly
  _atom_site_disorder_group
 O7 O 0.91487(17) 0.52826(12) 0.78992(17) 0.0287(5) Uani 1 1 d . . .
 O27 O 0.74323(18) 0.69258(12) 0.43233(17) 0.0334(5) Uani 1 1 d . . .
 O28 O 0.69818(18) 0.63336(12) 0.23874(18) 0.0319(5) Uani 1 1 d . . .
 N1 N 0.8708(2) 0.43942(14) 0.5438(2) 0.0254(6) Uani 1 1 d . . .
 C1 C 0.9501(2) 0.44080(17) 0.7687(3) 0.0259(7) Uani 1 1 d . . .
 C2 C 0.9296(2) 0.39905(18) 0.6491(3) 0.0251(6) Uani 1 1 d . . .
 C4 C 0.8283(3) 0.53085(18) 0.5408(3) 0.0246(6) Uani 1 1 d . . .
 C5 C 0.7493(3) 0.54430(16) 0.6387(2) 0.0238(6) Uani 1 1 d . . .
 C6 C 0.7973(3) 0.54173(16) 0.7646(3) 0.0251(7) Uani 1 1 d . . .
 C8 C 1.0114(3) 0.39852(19) 0.8704(3) 0.0304(7) Uani 1 1 d . . .
 C9 C 1.0556(3) 0.31455(19) 0.8590(3) 0.0316(7) Uani 1 1 d . . .
 C10 C 1.0341(3) 0.27156(19) 0.7437(3) 0.0290(7) Uani 1 1 d . . .
 C11 C 0.9725(2) 0.31314(18) 0.6413(3) 0.0260(6) Uani 1 1 d . . .
 C12 C 0.6316(3) 0.55561(17) 0.6147(3) 0.0268(7) Uani 1 1 d . . .
 C13 C 0.5675(3) 0.56736(19) 0.7128(3) 0.0326(7) Uani 1 1 d . . .
 C14 C 0.6185(3) 0.56780(19) 0.8373(3) 0.0346(8) Uani 1 1 d . . .
 C15 C 0.7349(3) 0.55516(18) 0.8641(3) 0.0325(8) Uani 1 1 d . . .
 C16 C 0.8376(3) 0.39238(18) 0.4256(3) 0.0253(7) Uani 1 1 d . . .
 C17 C 0.7859(2) 0.46566(17) 0.3395(3) 0.0253(6) Uani 1 1 d . . .
 C18 C 0.7791(2) 0.54045(17) 0.4042(2) 0.0242(6) Uani 1 1 d . . .
 C19 C 0.7546(2) 0.31600(17) 0.4344(2) 0.0256(6) Uani 1 1 d . . .
 C20 C 0.6727(3) 0.31981(19) 0.5166(3) 0.0277(7) Uani 1 1 d . . .
 C21 C 0.5965(3) 0.2506(2) 0.5229(3) 0.0340(8) Uani 1 1 d . . .
 C22 C 0.5996(3) 0.17790(19) 0.4440(3) 0.0317(7) Uani 1 1 d . . .
 C23 C 0.6801(3) 0.17418(19) 0.3613(3) 0.0307(7) Uani 1 1 d . . .
 C24 C 0.7572(3) 0.24252(18) 0.3548(3) 0.0294(7) Uani 1 1 d . . .
 C25 C 0.7546(3) 0.4450(2) 0.2016(3) 0.0335(8) Uani 1 1 d . . .
 C26 C 0.7384(3) 0.62946(18) 0.3616(3) 0.0271(7) Uani 1 1 d . . .
 C29 C 0.6649(3) 0.7216(2) 0.1939(3) 0.0347(8) Uani 1 1 d . . .
 H4 H 0.900(2) 0.5783(16) 0.559(2) 0.023(7) Uiso 1 1 d . . .
 H8 H 1.022(3) 0.435(2) 0.950(3) 0.056(10) Uiso 1 1 d . . .
 H9 H 1.102(3) 0.283(2) 0.930(3) 0.048(10) Uiso 1 1 d . . .
 H10 H 1.065(2) 0.2121(19) 0.730(3) 0.035(8) Uiso 1 1 d . . .
 H11 H 0.960(2) 0.2810(18) 0.561(3) 0.033(8) Uiso 1 1 d . . .
 H12 H 0.597(3) 0.5560(18) 0.530(3) 0.036(9) Uiso 1 1 d . . .
 H13 H 0.482(2) 0.5778(17) 0.693(2) 0.026(8) Uiso 1 1 d . . .
 H14 H 0.576(2) 0.5793(15) 0.906(2) 0.012(6) Uiso 1 1 d . . .
 H15 H 0.773(3) 0.5545(19) 0.948(3) 0.045(10) Uiso 1 1 d . . .
 H16 H 0.906(3) 0.3696(17) 0.393(2) 0.030(8) Uiso 1 1 d . . .
 H20 H 0.670(2) 0.3672(18) 0.569(3) 0.031(8) Uiso 1 1 d . . .
 H21 H 0.538(2) 0.2576(17) 0.577(3) 0.027(8) Uiso 1 1 d . . .
 H22 H 0.535(3) 0.1309(19) 0.444(3) 0.045(9) Uiso 1 1 d . . .
 H23 H 0.682(2) 0.1219(18) 0.303(2) 0.032(8) Uiso 1 1 d . . .
 H24 H 0.808(2) 0.2429(17) 0.295(2) 0.026(8) Uiso 1 1 d . . .
 H251 H 0.827(3) 0.427(2) 0.170(3) 0.053(10) Uiso 1 1 d . . .
 H252 H 0.707(3) 0.4965(19) 0.154(3) 0.035(8) Uiso 1 1 d . . .
 H253 H 0.706(3) 0.387(2) 0.195(3) 0.067(11) Uiso 1 1 d . . .
 H291 H 0.723(2) 0.7725(18) 0.232(2) 0.033(8) Uiso 1 1 d . . .
 H292 H 0.588(3) 0.740(2) 0.223(3) 0.074(12) Uiso 1 1 d . . .
 H293 H 0.657(3) 0.714(2) 0.100(3) 0.064(11) Uiso 1 1 d . . .

loop_
  _atom_site_aniso_label
  _atom_site_aniso_U_11
  _atom_site_aniso_U_22
  _atom_site_aniso_U_33
  _atom_site_aniso_U_23
  _atom_site_aniso_U_13
  _atom_site_aniso_U_12
 O7 0.0321(13) 0.0261(10) 0.0273(11) -0.0015(8) 0.0013(10) 0.0011(9)
 O27 0.0451(14) 0.0270(11) 0.0287(11) -0.0027(9) 0.0070(10) -0.0018(10)
 O28 0.0392(14) 0.0285(11) 0.0275(11) 0.0060(8) 0.0018(10) -0.0022(9)
 N1 0.0318(15) 0.0227(12) 0.0218(12) -0.0025(9) 0.0042(11) 0.0040(10)
 C1 0.0262(17) 0.0237(14) 0.0287(16) 0.0016(12) 0.0073(14) -0.0001(12)
 C2 0.0200(16) 0.0287(14) 0.0279(15) 0.0025(12) 0.0077(13) -0.0019(12)
 C4 0.0228(17) 0.0263(14) 0.0249(15) 0.0011(12) 0.0043(13) -0.0007(12)
 C5 0.0271(18) 0.0215(14) 0.0233(15) -0.0005(11) 0.0049(13) -0.0001(12)
 C6 0.0299(18) 0.0223(14) 0.0245(15) 0.0000(11) 0.0089(14) 0.0018(12)
 C8 0.0315(19) 0.0321(16) 0.0283(17) 0.0012(13) 0.0065(15) -0.0018(14)
 C9 0.0241(18) 0.0346(16) 0.0371(18) 0.0068(14) 0.0078(15) 0.0019(13)
 C10 0.0252(18) 0.0299(16) 0.0336(18) 0.0035(14) 0.0102(15) -0.0009(13)
 C11 0.0233(17) 0.0299(15) 0.0261(16) -0.0014(13) 0.0090(14) -0.0013(13)
 C12 0.0256(18) 0.0274(15) 0.0280(17) -0.0018(12) 0.0054(15) -0.0010(13)
 C13 0.032(2) 0.0297(15) 0.0377(19) 0.0025(13) 0.0109(16) 0.0050(14)
 C14 0.043(2) 0.0328(16) 0.0317(18) -0.0010(13) 0.0184(17) 0.0043(15)
 C15 0.042(2) 0.0266(15) 0.0293(18) 0.0005(13) 0.0073(16) 0.0058(14)
 C16 0.0257(18) 0.0280(15) 0.0228(15) -0.0036(12) 0.0061(14) -0.0017(13)
 C17 0.0248(17) 0.0284(14) 0.0242(15) 0.0016(12) 0.0093(13) -0.0046(12)
 C18 0.0254(17) 0.0264(14) 0.0216(15) 0.0024(11) 0.0056(13) -0.0048(12)
 C19 0.0280(17) 0.0253(14) 0.0241(15) 0.0045(12) 0.0052(14) 0.0024(12)
 C20 0.0315(19) 0.0308(15) 0.0219(15) -0.0032(13) 0.0081(14) -0.0017(14)
 C21 0.0318(19) 0.0406(18) 0.0321(18) 0.0007(14) 0.0139(16) -0.0049(14)
 C22 0.0317(19) 0.0323(16) 0.0312(17) 0.0056(13) 0.0046(15) -0.0033(14)
 C23 0.0341(19) 0.0269(15) 0.0322(17) -0.0031(13) 0.0089(15) -0.0023(14)
 C24 0.0330(19) 0.0312(16) 0.0259(17) 0.0015(12) 0.0106(15) -0.0004(14)
 C25 0.045(2) 0.0344(18) 0.0221(16) 0.0023(13) 0.0064(16) -0.0027(16)
 C26 0.0287(18) 0.0320(16) 0.0218(16) 0.0043(12) 0.0069(14) -0.0021(13)
 C29 0.037(2) 0.0295(16) 0.036(2) 0.0074(14) 0.0010(17) 0.0004(15)

_geom_special_details             
;
 All esds (except the esd in the dihedral angle between two l.s. planes)
 are estimated using the full covariance matrix. The cell esds are taken
 into account individually in the estimation of esds in distances, angles
 and torsion angles correlations between esds in cell parameters are only
 used when they are defined by crystal symmetry. An approximate (isotropic)
 treatment of cell esds is used for estimating esds involving l.s. planes.
;
loop_
  _geom_bond_atom_site_label_1
  _geom_bond_atom_site_label_2
  _geom_bond_distance
  _geom_bond_site_symmetry_2
  _geom_bond_publ_flag
 O7 C6 1.402(4) . ?
 O7 C1 1.409(3) . ?
 O27 C26 1.210(3) . ?
 O28 C26 1.338(3) . ?
 O28 C29 1.450(3) . ?
 N1 C2 1.385(3) . ?
 N1 C16 1.456(3) . ?
 N1 C4 1.466(3) . ?
 C1 C8 1.383(4) . ?
 C1 C2 1.414(4) . ?
 C2 C11 1.397(4) . ?
 C4 C5 1.503(4) . ?
 C4 C18 1.505(4) . ?
 C4 H4 1.11(3) . ?
 C5 C6 1.391(4) . ?
 C5 C12 1.398(4) . ?
 C6 C15 1.383(4) . ?
 C8 C9 1.380(4) . ?
 C8 H8 1.01(3) . ?
 C9 C10 1.384(4) . ?
 C9 H9 1.00(3) . ?
 C10 C11 1.385(4) . ?
 C10 H10 0.98(3) . ?
 C11 H11 0.98(3) . ?
 C12 C13 1.380(4) . ?
 C12 H12 0.94(3) . ?
 C13 C14 1.387(4) . ?
 C13 H13 1.02(3) . ?
 C14 C15 1.389(5) . ?
 C14 H14 0.96(2) . ?
 C15 H15 0.95(3) . ?
 C16 C17 1.515(4) . ?
 C16 C19 1.525(4) . ?
 C16 H16 0.99(3) . ?
 C17 C18 1.329(4) . ?
 C17 C25 1.502(4) . ?
 C18 C26 1.477(4) . ?
 C19 C20 1.390(4) . ?
 C19 C24 1.397(4) . ?
 C20 C21 1.387(4) . ?
 C20 H20 0.91(3) . ?
 C21 C22 1.384(4) . ?
 C21 H21 0.96(3) . ?
 C22 C23 1.381(4) . ?
 C22 H22 1.04(3) . ?
 C23 C24 1.385(4) . ?
 C23 H23 1.00(3) . ?
 C24 H24 0.93(3) . ?
 C25 H251 0.99(4) . ?
 C25 H252 1.05(3) . ?
 C25 H253 1.05(4) . ?
 C29 H291 1.08(3) . ?
 C29 H292 1.04(4) . ?
 C29 H293 1.00(3) . ?

loop_
  _geom_angle_atom_site_label_1
  _geom_angle_atom_site_label_2
  _geom_angle_atom_site_label_3
  _geom_angle
  _geom_angle_site_symmetry_1
  _geom_angle_site_symmetry_3
  _geom_angle_publ_flag
 C6 O7 C1 114.4(2) . . ?
 C26 O28 C29 114.3(2) . . ?
 C2 N1 C16 122.8(2) . . ?
 C2 N1 C4 124.6(2) . . ?
 C16 N1 C4 112.5(2) . . ?
 C8 C1 O7 116.3(2) . . ?
 C8 C1 C2 121.0(3) . . ?
 O7 C1 C2 122.6(2) . . ?
 N1 C2 C11 120.6(2) . . ?
 N1 C2 C1 123.1(2) . . ?
 C11 C2 C1 116.3(3) . . ?
 N1 C4 C5 110.8(2) . . ?
 N1 C4 C18 101.7(2) . . ?
 C5 C4 C18 117.3(2) . . ?
 N1 C4 H4 110.2(13) . . ?
 C5 C4 H4 109.1(13) . . ?
 C18 C4 H4 107.5(13) . . ?
 C6 C5 C12 117.3(3) . . ?
 C6 C5 C4 116.8(3) . . ?
 C12 C5 C4 125.9(3) . . ?
 C15 C6 C5 122.8(3) . . ?
 C15 C6 O7 119.3(3) . . ?
 C5 C6 O7 117.9(2) . . ?
 C9 C8 C1 121.4(3) . . ?
 C9 C8 H8 124.9(18) . . ?
 C1 C8 H8 113.7(18) . . ?
 C8 C9 C10 118.5(3) . . ?
 C8 C9 H9 122.9(18) . . ?
 C10 C9 H9 118.6(18) . . ?
 C9 C10 C11 120.6(3) . . ?
 C9 C10 H10 121.9(16) . . ?
 C11 C10 H10 117.5(16) . . ?
 C10 C11 C2 122.1(3) . . ?
 C10 C11 H11 118.2(16) . . ?
 C2 C11 H11 119.7(16) . . ?
 C13 C12 C5 120.7(3) . . ?
 C13 C12 H12 120.8(19) . . ?
 C5 C12 H12 118.5(19) . . ?
 C12 C13 C14 120.6(3) . . ?
 C12 C13 H13 119.2(15) . . ?
 C14 C13 H13 120.2(15) . . ?
 C13 C14 C15 119.9(3) . . ?
 C13 C14 H14 121.4(15) . . ?
 C15 C14 H14 118.6(14) . . ?
 C6 C15 C14 118.5(3) . . ?
 C6 C15 H15 119(2) . . ?
 C14 C15 H15 122(2) . . ?
 N1 C16 C17 102.4(2) . . ?
 N1 C16 C19 114.9(2) . . ?
 C17 C16 C19 111.8(2) . . ?
 N1 C16 H16 108.9(16) . . ?
 C17 C16 H16 109.4(15) . . ?
 C19 C16 H16 109.2(16) . . ?
 C18 C17 C25 131.3(3) . . ?
 C18 C17 C16 110.5(2) . . ?
 C25 C17 C16 118.2(2) . . ?
 C17 C18 C26 130.5(3) . . ?
 C17 C18 C4 112.3(2) . . ?
 C26 C18 C4 117.2(2) . . ?
 C20 C19 C24 119.1(3) . . ?
 C20 C19 C16 121.1(2) . . ?
 C24 C19 C16 119.8(3) . . ?
 C21 C20 C19 120.8(3) . . ?
 C21 C20 H20 119.0(18) . . ?
 C19 C20 H20 120.2(18) . . ?
 C20 C21 C22 119.9(3) . . ?
 C20 C21 H21 118.0(16) . . ?
 C22 C21 H21 121.9(16) . . ?
 C23 C22 C21 119.6(3) . . ?
 C23 C22 H22 122.8(16) . . ?
 C21 C22 H22 117.4(17) . . ?
 C22 C23 C24 121.1(3) . . ?
 C22 C23 H23 119.6(16) . . ?
 C24 C23 H23 119.3(16) . . ?
 C23 C24 C19 119.6(3) . . ?
 C23 C24 H24 121.7(16) . . ?
 C19 C24 H24 118.6(16) . . ?
 C17 C25 H251 105.7(19) . . ?
 C17 C25 H252 111.8(15) . . ?
 H251 C25 H252 118(2) . . ?
 C17 C25 H253 108.1(18) . . ?
 H251 C25 H253 104(3) . . ?
 H252 C25 H253 109(3) . . ?
 O27 C26 O28 123.9(2) . . ?
 O27 C26 C18 122.3(2) . . ?
 O28 C26 C18 113.8(2) . . ?
 O28 C29 H291 113.1(15) . . ?
 O28 C29 H292 111(2) . . ?
 H291 C29 H292 104(2) . . ?
 O28 C29 H293 102.3(19) . . ?
 H291 C29 H293 116(2) . . ?
 H292 C29 H293 111(3) . . ?
